# Supplementary material for: Deep Learning Methods in Medical Image-Based Hepatocellular Carcinoma Diagnosis: A Systematic Review and Meta-Analysis
Source: MDPI journal article supplement (doi:10.3390/cancers15235701), 2023-12-03
Supplement: s1 [file s1]

Supplementary Figure S3: Publication bias.

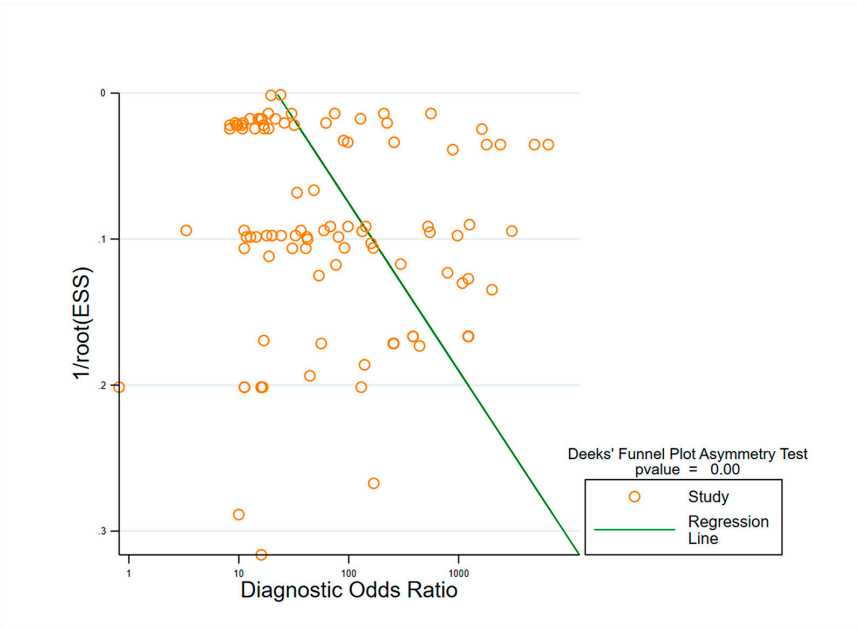

Supplementary Table S1: Meta-regression result.

| Covariates         | Subgroup                     | LRTChi2 | $I^2$ | $P$ value |
|--------------------|------------------------------|---------|-------|-----------|
| Image method       | Contrast-enhanced images     | 11.20   | 82    | <0.05     |
|                    | Non-contrast-enhanced images |         |       |           |
| Imaging modalities | MRI                          | 0.25    | 0     | 0.88      |
|                    | Ultrasound                   |         |       |           |
|                    | CT                           |         |       |           |
| Validation type    | Internal validation          | 17.85   | 89    | <0.05     |
|                    | External validation          |         |       |           |
