# Supplementary material for: Deep Learning Methods in Medical Image-Based Hepatocellular Carcinoma Diagnosis: A Systematic Review and Meta-Analysis
Source: MDPI journal article supplement (doi:10.3390/cancers15235701), 2023-12-03
Supplement: s1 [file s1]

## Supplementary Note SI. Search terms and search strategy

### Pubmed

Search: (((Carcinoma, Hepatocellular[MeSH Terms]) OR (hepatocellular carcinoma[Title/Abstract])) OR (HCC[Title/Abstract])) AND (((Artificial intelligence[MeSH Terms]) OR (deep learning[Title/Abstract])) OR (neural network[Title/Abstract])) AND (((diagnosis[Title/Abstract]) OR (screen[Title/Abstract])) OR (classify[Title/Abstract])) OR (discriminate[Title/Abstract]))

### Embase

#1 'artificial intelligence'/exp OR 'deep learning'/exp OR 'artificial neural network'/exp  
#2 'diagnosis'/exp OR 'diagnostic procedure'/exp OR 'screening'/exp OR 'classification'/exp OR 'discriminate'  
#3 'performance'/exp OR 'sensitivity and specificity'/exp OR 'diagnostic accuracy'/exp OR 'area under the curve'/exp  
#4 'carcinoma, hepatocellular'/exp OR 'hepatocellular carcinoma'/exp OR 'HCC'  
#5 #1 AND #2 AND #3 AND #4

### Cochrane

("Artificial intelligence" OR "deep learning " OR neural network" ) AND ("diagnosis" OR "screening" OR " classification " OR " discriminate " ) AND ("performance" OR "sensitivity" OR "specificity" OR "accuracy" OR "area under the curve" OR "auc" OR "calibrate ") AND ("Carcinoma, Hepatocellular" OR "hepatocellular carcinoma" OR "HCC")

### Web of Science

((TS=(Artificial intelligence)) OR TS=(deep learning)) OR TS=(neural network)  
(((TS=(diagnosis)) OR TS=(screening)) OR TS=(classification)) OR TS=(discriminate)  
((((TS=(performance)) OR TS=(sensitivity)) OR TS=(specificity)) OR TS=(accuracy)) OR TS=(area under the curve)) OR TS=(auc)) OR TS=(calibrate)  
((TS=(Carcinoma, Hepatocellular)) OR TS=(hepatocellular carcinoma)) OR TS=(HCC)

### IEEE

("All Metadata":"artificial intelligence" OR "All Metadata":"deep learning" OR "All Metadata":"neural network") AND ("All Metadata":"performance" OR "All Metadata":"sensitivity and specificity" OR "All Metadata":"accuracy" OR "All Metadata":"area under the curve") AND ("All Metadata":"screening" OR "All Metadata":"diagnosis" OR "All Metadata":"classification" OR "All Metadata":"discriminat" ) AND ("All Metadata":" Carcinoma, Hepatocellular " OR "All Metadata":"hepatocellular carcinoma "OR "All Metadata":"HCC")
