# Supplementary material for: Deep Learning Methods in Medical Image-Based Hepatocellular Carcinoma Diagnosis: A Systematic Review and Meta-Analysis
Source: MDPI journal article supplement (doi:10.3390/cancers15235701), 2023-12-03

Supplementary Figure S5: Forest plot of different medical image features (contrast-enhanced [19,20,22–25,27–38,43–45,47,48] and non-contrast-enhanced images [21,26,39,40,42,46]).

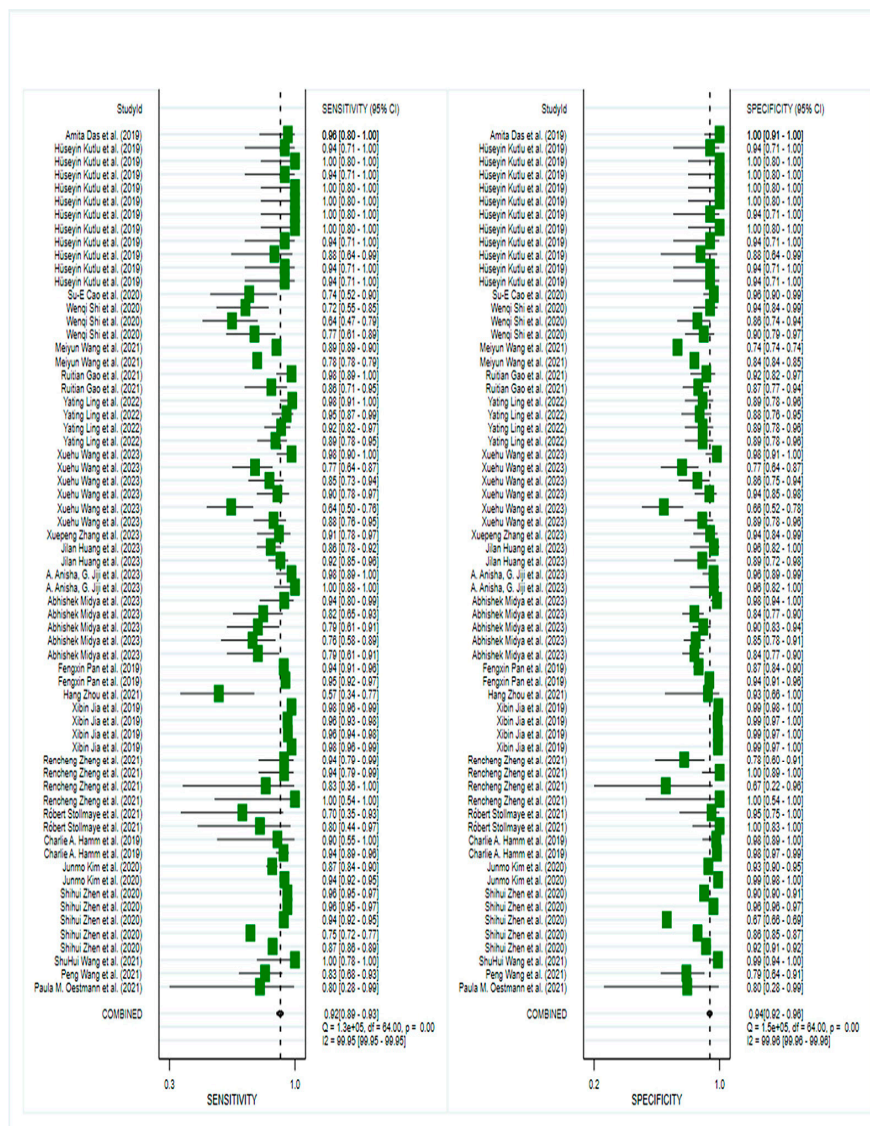

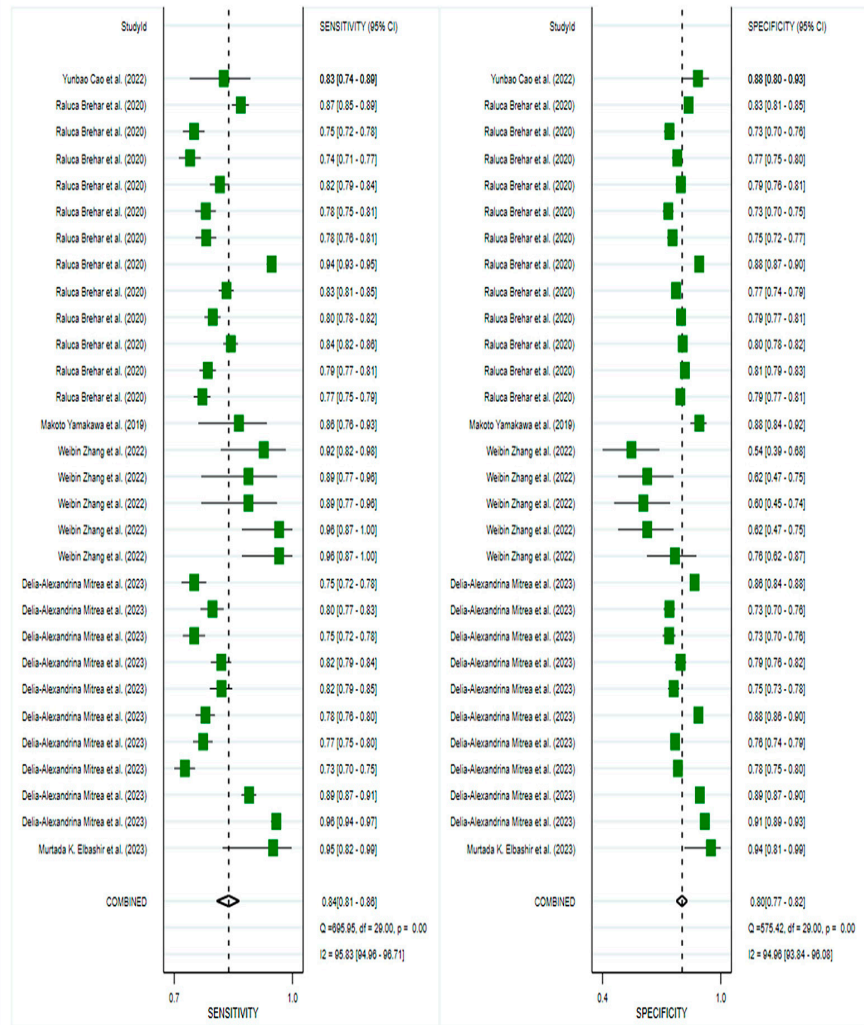

Supplementary Figure S6: Forest plot of different imaging modalities (MRI [23–25,28,34,33,37,35,36,41], US [20,21,26,32,40,42,46], and CT [19,22,27,29,30,31,38,39,43–45,47,48,]).

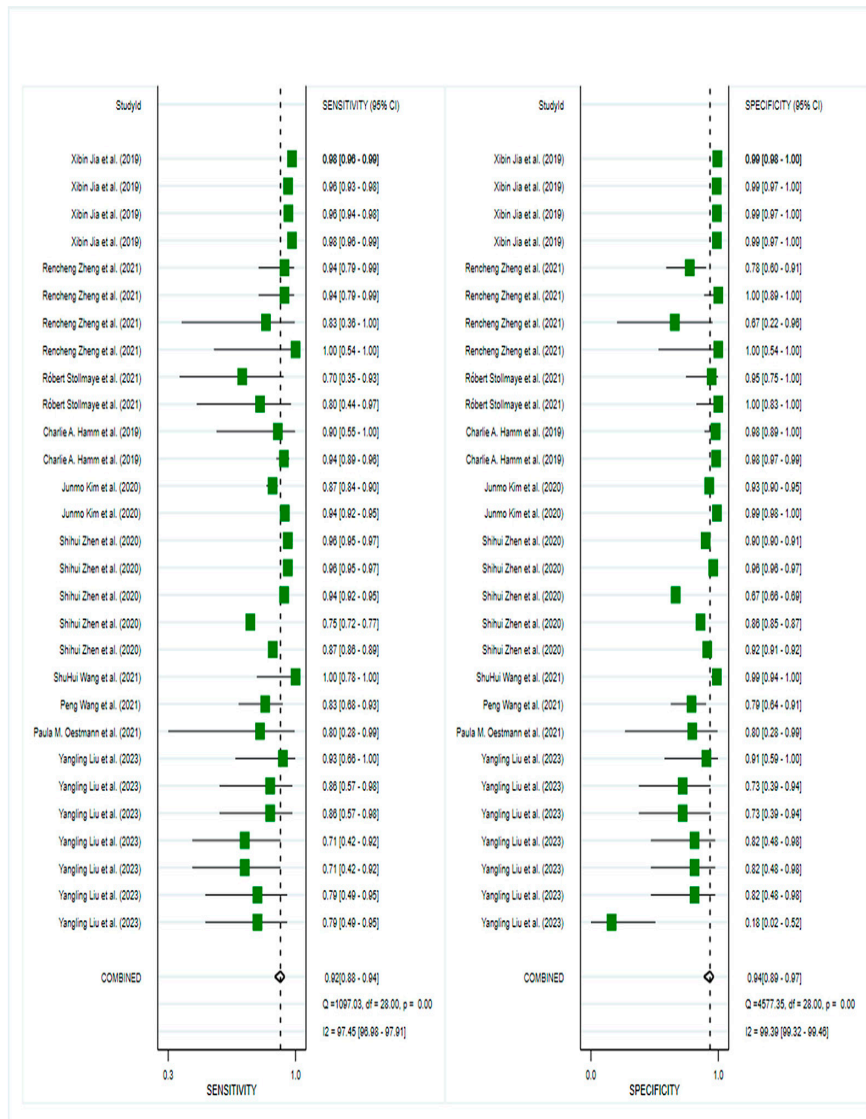

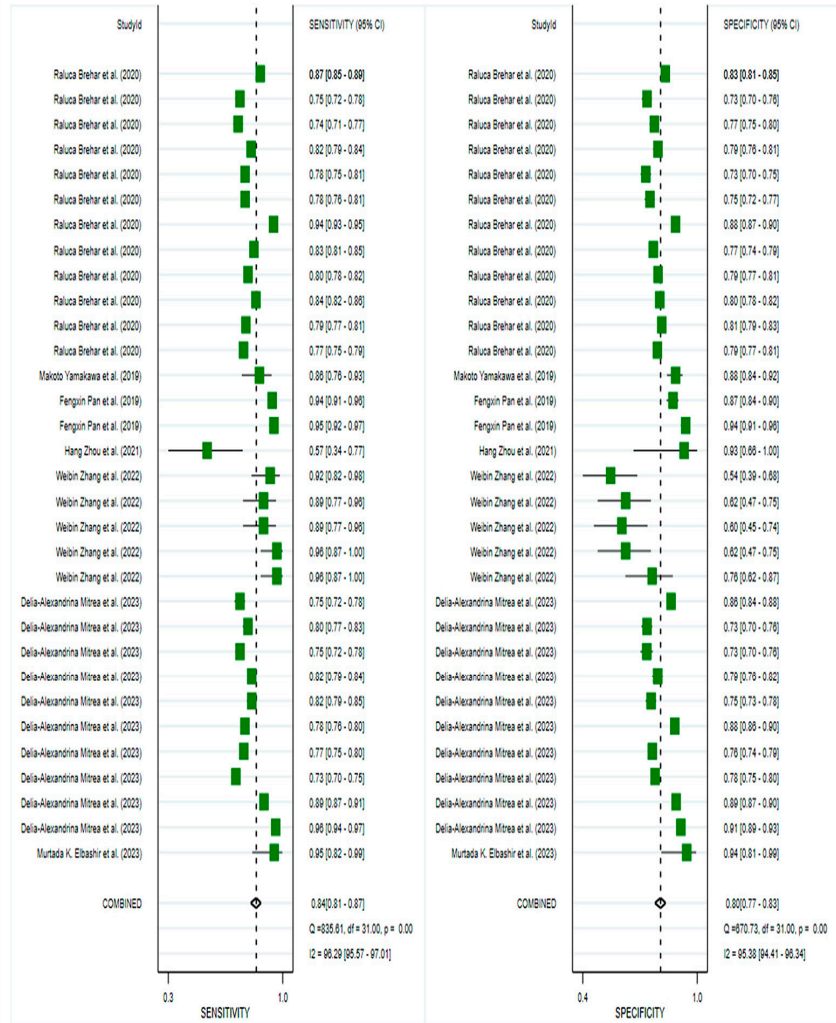



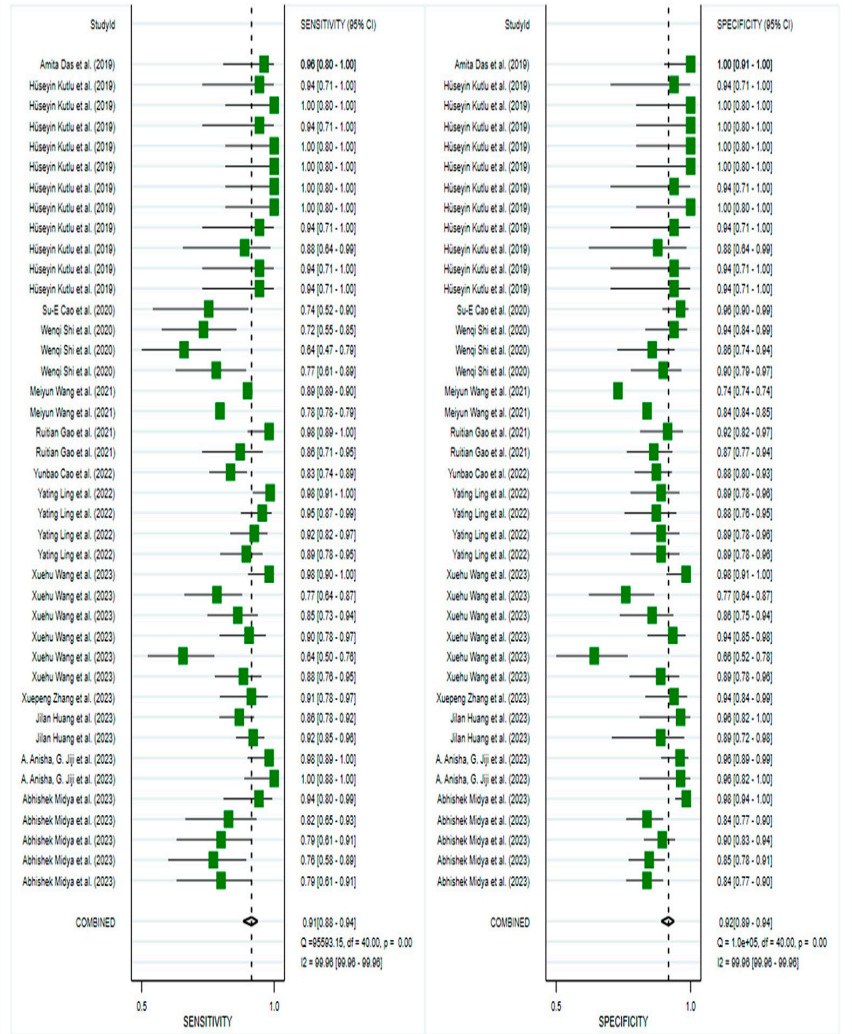

Supplementary Figure S7: Forest plot of different validation types (internal [19–39,41–48] or external [23,28,30,31,40]).

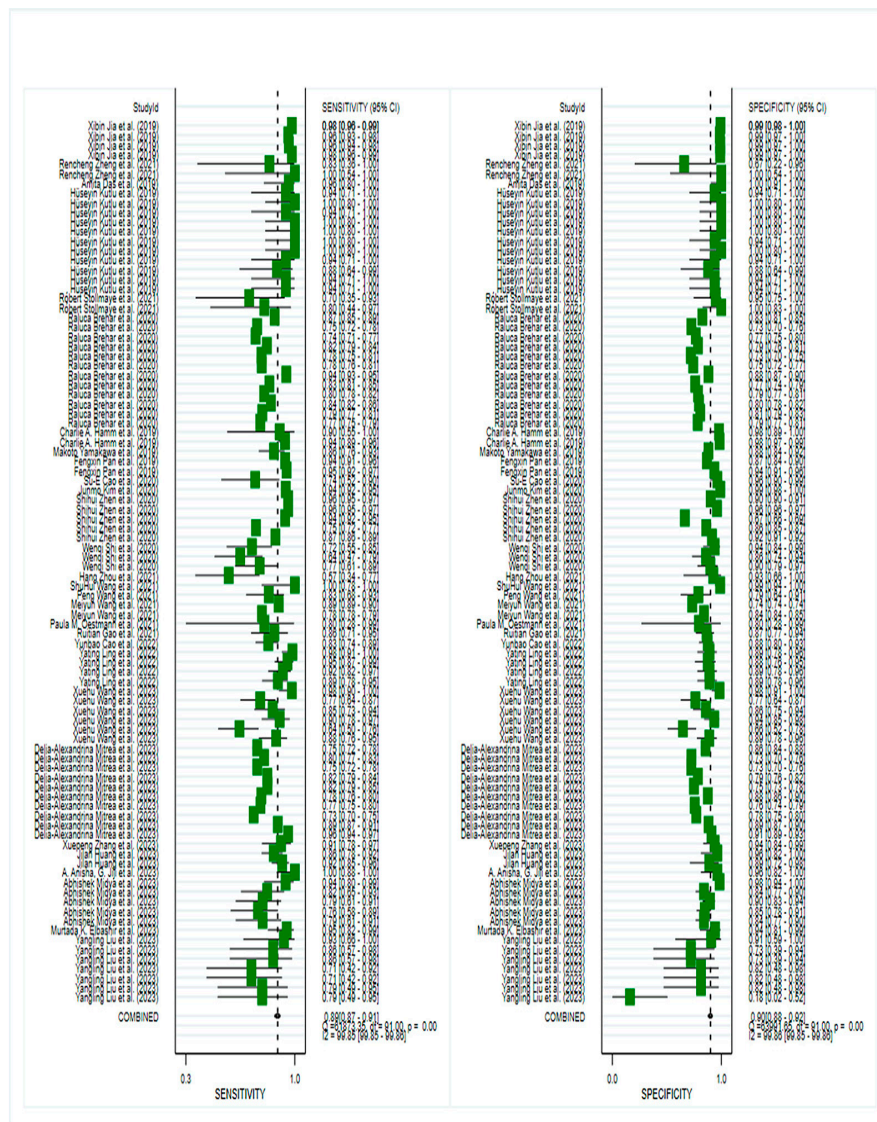

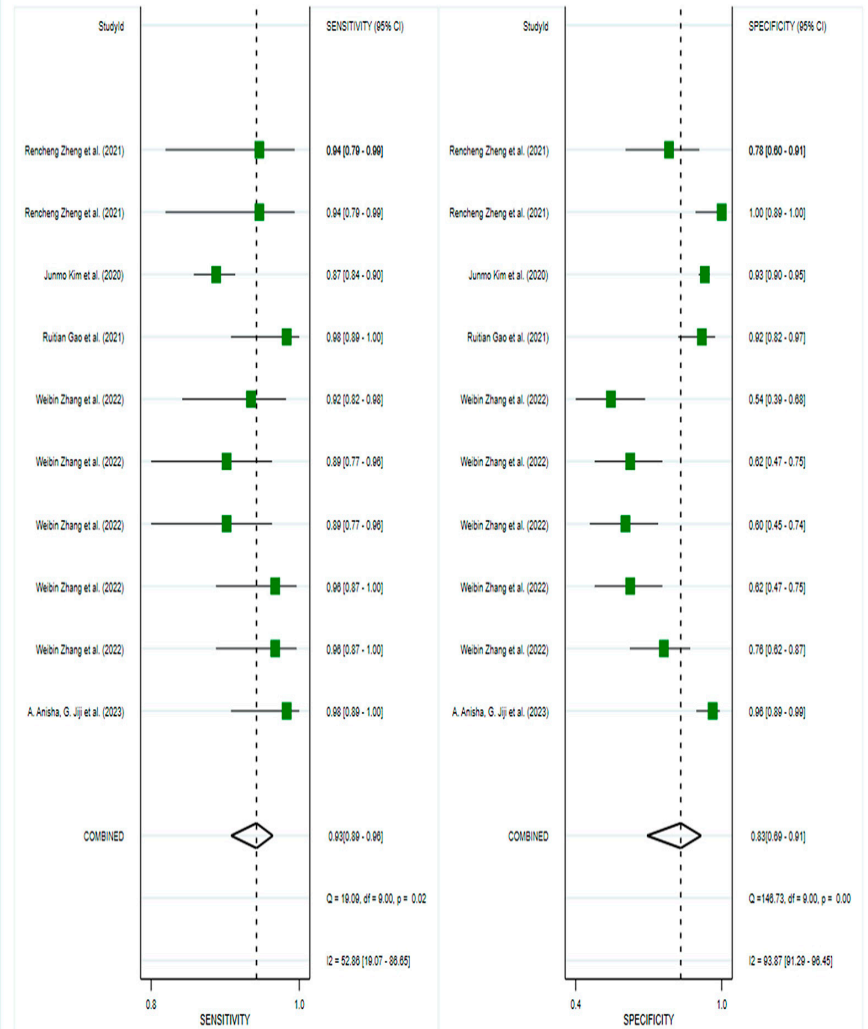

Supplement: s1 [file s1]
