# Supplementary material for: Deep Learning Methods in Medical Image-Based Hepatocellular Carcinoma Diagnosis: A Systematic Review and Meta-Analysis
Source: MDPI journal article supplement (doi:10.3390/cancers15235701), 2023-12-03
Supplement: s1 [file s1]

### Supplementary Online Conte

#### Deep Learning Algorithms in Medical Image-based Hepatocellular Carcinoma Diagnosis: A Systematic Review and Meta-analysis

Supplementary Figure S1: QUADAS-2 summary plot. Risk of bias and applicability concerns summary about each QUADAS-2 domain presented as percentages across the 48 included studies [19–66]

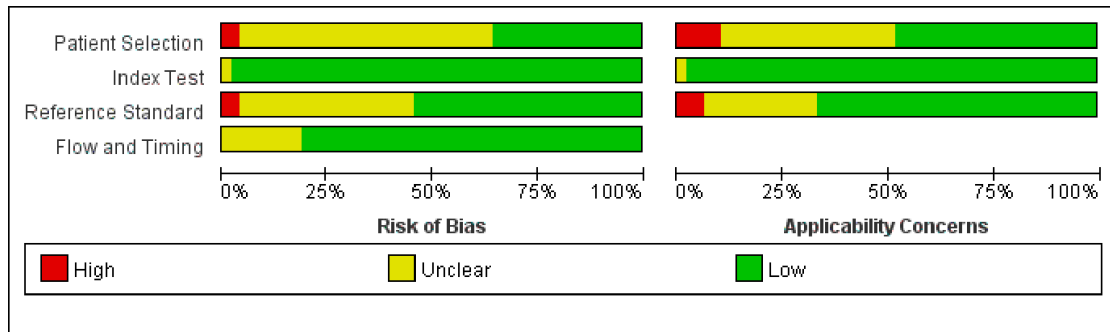

Supplementary Figure S2: Risk of bias and concern of applicability for each item in included studies [19–66].

|                          | Risk of Bias      |            |                    |                 | Applicability Concerns |            |                    |
|--------------------------|-------------------|------------|--------------------|-----------------|------------------------|------------|--------------------|
|                          | Patient Selection | Index Test | Reference Standard | Flow and Timing | Patient Selection      | Index Test | Reference Standard |
| A. Anisha ,G.Jiji (2023) | ?                 | +          | ?                  | ?               | ?                      | +          | +                  |
| Abhishek Midya (2023)    | +                 | +          | +                  | +               | +                      | +          | +                  |
| Amita Das (2019)         | ?                 | +          | +                  | +               | ?                      | +          | +                  |
| Anh Cang Phan (2023)     | ?                 | +          | ?                  | +               | ?                      | +          | ?                  |
| B. Schmauch (2019)       | ?                 | +          | ?                  | ?               | ?                      | +          | ?                  |
| Cătălin Daniel.C (2021)  | ?                 | +          | ?                  | +               | ?                      | +          | ?                  |
| Charlie A. Hamm (2019)   | ?                 | +          | ?                  | +               | ?                      | +          | +                  |
| Delia A. Mitrea (2023)   | ?                 | +          | +                  | +               | +                      | +          | +                  |
| Delia Mitrea (2019)      | ?                 | +          | ?                  | +               | ?                      | +          | ?                  |
| Dong Wook Kim (2021)     | +                 | +          | +                  | +               | +                      | +          | +                  |
| Fengxin Pan (2019)       | ?                 | +          | +                  | +               | +                      | +          | +                  |
| Hang Zhou (2021)         | +                 | +          | +                  | +               | +                      | +          | +                  |
| Hüseyin Kutlu (2019)     | ?                 | +          | +                  | +               | +                      | +          | +                  |
| Jilan Huang (2023)       | +                 | +          | +                  | +               | +                      | +          | +                  |
| Junmo Kim (2020)         | +                 | +          | +                  | +               | +                      | +          | +                  |
| Koichiro Yasaka (2017)   | +                 | +          | +                  | +               | +                      | +          | +                  |
| Makoto Yamakawa (2019)   | ?                 | +          | ?                  | ?               | ?                      | +          | +                  |
| Meiyun Wang (2021)       | +                 | +          | +                  | +               | +                      | +          | +                  |
| Murtada.K.E.(2023)       | ?                 | +          | ?                  | ?               | ?                      | +          | +                  |
| NamJoon Kim (2023)       | ?                 | +          | ?                  | +               | ?                      | +          | ?                  |
| Paula M. Oestmann (2021) | ?                 | +          | +                  | +               | +                      | +          | +                  |
| Peng Wang (2021)         | +                 | +          | +                  | +               | +                      | +          | +                  |
| Prabhu Kavin .B (2023)   | ?                 | +          | ?                  | +               | ?                      | +          | ?                  |
| Puja Bharti (2018)       | ?                 | +          | ?                  | +               | ?                      | +          | ?                  |
| Qingqing Chen (2022)     | +                 | +          | +                  | +               | +                      | +          | +                  |
| Qiyuan Wang (2020)       | ?                 | +          | +                  | +               | +                      | +          | ?                  |
| Raluca Brehar (2020)     | ?                 | ?          | ?                  | ?               | +                      | ?          | +                  |
| Rayyan Azam Khan (2023)  | ?                 | +          | +                  | +               | ?                      | +          | +                  |
| Rencheng Zheng (2021)    | +                 | +          | +                  | +               | +                      | +          | +                  |
| Róbert Stollmayer (2021) | +                 | +          | +                  | +               | +                      | +          | +                  |
| Ruitian Gao (2021)       | +                 | +          | +                  | +               | +                      | +          | +                  |
| Sayan Saha Roy (2023)    | ?                 | +          | ?                  | +               | ?                      | +          | +                  |
| Shihui Zhen (2020)       | +                 | +          | +                  | +               | +                      | +          | +                  |
| Shu-Hui Wang (2021)      | +                 | +          | +                  | +               | +                      | +          | +                  |
| SuE Cao (2020)           | ?                 | +          | +                  | +               | +                      | +          | +                  |
| Tarek M. Hassan (2017)   | ?                 | +          | ?                  | ?               | ?                      | +          | ?                  |
| Weibin Zhang (2022)      | +                 | +          | +                  | +               | +                      | +          | +                  |
| Wen Fan Chen (2021)      | +                 | +          | ?                  | +               | +                      | +          | ?                  |
| Wenqi Shi (2020)         | +                 | +          | +                  | +               | +                      | +          | +                  |
| Xiangfei Feng (2023)     | ?                 | +          | ?                  | +               | ?                      | +          | ?                  |
| Xiaojiao Xiao (2022)     | ?                 | +          | ?                  | ?               | ?                      | +          | ?                  |
| Xibin Jia (2019)         | ?                 | +          | +                  | +               | ?                      | +          | +                  |
| Xingxin Xu (2023)        | ?                 | +          | ?                  | +               | ?                      | +          | ?                  |
| Xuehu Wang (2023)        | +                 | +          | ?                  | ?               | +                      | +          | +                  |
| Xuepeng Zhang (2023)     | ?                 | +          | ?                  | ?               | ?                      | +          | +                  |
| Yangling Liu (2023)      | +                 | +          | +                  | +               | +                      | +          | +                  |
| Yating Ling (2022)       | ?                 | +          | +                  | +               | +                      | +          | +                  |
| Yubao Cao (2022)         | ?                 | +          | +                  | +               | +                      | +          | +                  |

High
Unclear
Low
