# Supplementary material for: Deep Learning Methods in Medical Image-Based Hepatocellular Carcinoma Diagnosis: A Systematic Review and Meta-Analysis
Source: Cancers (Basel). 2023 Dec 3;15(23):5701. doi: 10.3390/cancers15235701 (PMC10705136; doi:10.3390/cancers15235701)
Supplement: Supplementary file 1 [file cancers-15-05701-s001.zip]

Archive with 4 entries (4 files):
- Supplementary File S1.pdf
- Supplementary File S2.pdf
- Supplementary File S3.pdf
- Supplementary Note SI. Search terms and search strategy .pdf
